# Supplementary material for: In Vitro Gene Delivery in Retinal Pigment Epithelium Cells by Plasmid DNA-Wrapped Gold Nanoparticles
Source: PubMed Central journal article supplement (PMC6523520; doi:10.3390/genes10040289), 2019-04-09
Supplement: genes-10-00289-s001.pdf [file genes-10-00289-s001.pdf]

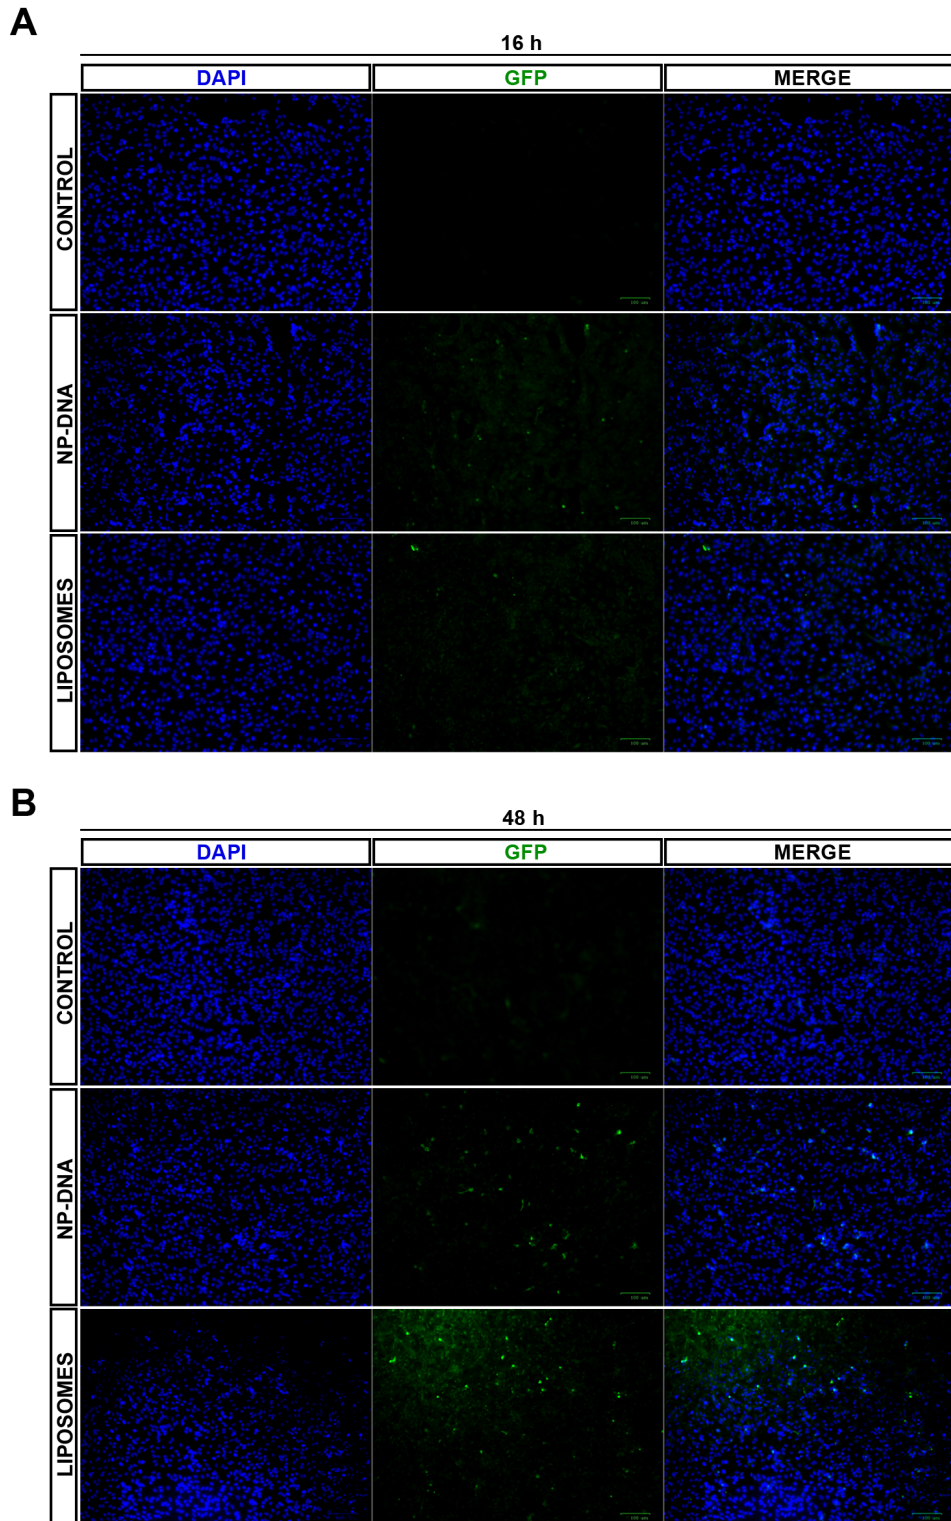

**Supplementary Figure 1.- Transfection efficiency of DNA wrapped-gold nanosomes (40 nm) compared to liposomes in differentiated ARPE-19 cells** (wider field image of Figure 1). Representative image of differentiated ARPE-19 cells transfected with the pEGFP reporter vector using either liposomes (LIPOTRANSFECTINE) or nanosomes (DNA-NPs) at 16 hours (**A**) and 48 hours (**B**), showing that a higher number of cells were GFP positive at 16 h in nanosome- versus liposome-transfected cells, indicating differences in the cellular uptake and/or intracellular vesicular trafficking routes between the two transfection systems (Images obtained in a ZOE™ Fluorescent Cell Imager).
